# Supplementary material for: Surface hydroxide accelerates acidic hydrogen oxidation kinetics
Source: Research Square preprint supplement (doi:10.21203/rs.3.rs-6674045/v1), 2025-06-02
Supplement: Supplementary file 1 [file 4b4ec45a94dee4f79d78c2c2.docx]

Supplementary Information for **Surface hydroxide accelerates acidic hydrogen oxidation kinetics**

Yanrong Xue1,2,6, Jinjie Fang1,2,6, Yu Mao3,6, Xingdong Wang1, Xuerui Liu1,2, Ying-Rui Lu4, Jiajing Pei1, Jiazhan Li5, Wei Zhu1, Ziyun Wang3*, Zhongbin Zhuang1,2*

1. State Key Lab of Organic-Inorganic Composites, Beijing University of Chemical Technology, 100029 Beijing, China.
2. Beijing Advanced Innovation Center for Soft Matter Science and Engineering, Beijing University of Chemical Technology, 100029 Beijing, China.
3. School of Chemical Sciences, University of Auckland, Auckland, New Zealand.
4. National Synchrotron Radiation Research Center, Hsinchu 300, Taiwan, China.
5. Engineering Research Center of Advanced Rare Earth Materials, Department of Chemistry, Tsinghua University, Beijing 100084, China.
6. These authors contributed equally: Yanrong Xue, Jinjie Fang, Yu Mao

* Corresponding author: ziyun.wang@auckland.ac.nz (Z. W.); zhuangzb@mail.buct.edu.cn (Z. Z.)

**Table of contents**

Supplementary Methods Page 3-4

Supplementary Figures 1-28 Page 5-32

Supplementary Notes 1, 2, 3 Page 7, 13, 38

Supplementary Tables 1-6 Page 33-39

Supplementary References Page 40-41

**Supplementary Methods**

**Determination of HOR/HER exchange current density**

The exchange current () is calculated to represent the HOR/HER activity, which was obtained by fitting the kinetic current () with the Butler-Volmer equation.

(1)

where is the universal gas constant, is the temperature in Kelvin, is Faraday’s constant, and *α* is the charge transfer coefficient.

was obtained according to the Koutecky−Levich equation,

(2)

where and represent the measured current and diffusion-limited current, respectively. And the is calculated from the Nernstian diffusional overpotential (),

(3)

where is the universal gas constant, is the temperature in Kelvin, is Faraday’s constant, and is the H2-limiting current.

The was normalized to the electrochemical surface area (ECSA) to get the exchange current density (). ECSA was determined by Cuupd stripping voltammetry for Ru and Hupd stripping voltammetry for Rh and Pd. Cuupd stripping voltammetry was performed in an Ar-purged 0.5 M H2SO4 solution containing 5 mM of CuSO4. The Cu was first deposited on the Ru film with a constant potential for 100 s followed by stripping using linear scanning voltammetry (LSV) from the deposition potential to 0.9 V with a scanning rate of 10 mV s−1. The optimized deposition potential was checked between 0.24 and 0.3 V. The obtained LSV, having the biggest stripping peak but without the oxidation of bulk Cu, was used to calculate the ECSA of Ru using a charge density of 420 μC cmRu−2. The CV in an Ar-purged 0.5 M H2SO4 solution from 0.02 ~ 0.9 V with the scanning rate of 10 mV s−1 served as the background for the corresponding Cuupd stripping voltammogram. Hupd stripping voltammetry was performed in Ar-purged 5 mM HClO4 with a potential window of 0.03 ~ 0.5 V for Rh (0.1 ~ 0.5 V for Pd) and a scanning rate of 50 mV s−1, and the ECSAs of them were calculated using a charge density of 210 μC cm−2.

**Preparation of working electrode for SEIRAS**

The reflecting face of a Si crystal was first chemically deposited with Au. Before the chemical deposition, the reflecting surface of the Si crystal was cleaned with aqua regia (HCl:HNO3 = 3:1) and polished with 1 μm Al2O3 powder (Buehler) for 10 min. Then, the crystal was sonicated in acetone and ultrapure water several times to clean the Al2O3 powder thoroughly. After that, the reflecting surface of the crystal was treated with a mixed acid of H2SO4/H2O2 (H2SO4:H2O2=3:1) for 30 min, followed by washing with plenty of ultrapure water and drying with an Ar flow (99.999%). The oxidized surface crystal was treated with a 40 wt% NH4F (Aladdin, 98%) solution for 5 min to terminate the surface with hydrogen. Finally, the treated reflecting plane was immediately soaked into a mixture of 15 mL Au plating solution and 3.4 mL of 2 wt% HF solution at 55 ºC for 8 min to form a uniform and bright Au film with an ohmic resistance of around 4 Ω.

Then, the Ru film was electrodeposited on the surface of the Au film. An Au-coated crystal was assembled into a homemade spectro-electrochemical cell, and a carbon rod and an RHE immersed in a Luggin capillary as counter and reference electrode, respectively. Before the electrodeposition of Ru, the Au film was cleaned by CV in 0.1 M HClO4 from 0.4 ~ 1.4 V with a scanning rate of 50 mV s−1 for 10 cycles. After electrodepositing Ru on the Au-coated crystal, the Ru film was roughened with a small anodic current density of 50 μA cm−2 to enhance the IR signal of the Ru-H peak. Finally, the prepared Ru thin film was tested immediately in H2-saturated 0.1 M HClO4.

**EXAFS data fitting**

The EXAFS data were processed by Athena and Artemis in the IFEFFIT packages. Firstly, the EXAFS spectra were obtained by Fourier transforming the data with Hanning windows (dk=0.5) to separate the contributions from different coordination shells. Then, quantitative structural parameters around the Ru atom were obtained by fitting them with the following EXAFS equation using the ARTEMIS module.

(5)

Where is the amplitude reduction factor, is the effective curved-wave backscattering amplitude, is the number of neighbor atoms from different coordination shells, is the distance between the core atom and neighbor atoms, is the mean free path in , is the phase shift (including the phase shift for each shell and the total central atom phase shift), and is the Debye-Waller parameter of the different atomic shells. The functions , and were calculated by the ab initio code FEFF8.2. During the fitting process, was fixed. While R, and the edge-energy shift were allowed to run freely.

**Physical characterization of the synthesized nanosized Ru-based catalyst**

The morphology of the catalyst was investigated using transmission electron microscopy (TEM, JEOL JEM-1230) operated at 100 kV. The high-solution transmission electron microscopy (HRTEM, Titan 80-300) images were operated at 300 kV, equipped with a probe spherical aberration corrector. X-ray photoelectron spectroscopy (XPS) measurements were performed on a Thermo Fisher ESCALAB 250Xi XPS system with a monochromatic Al Kα X-ray source. The Ru loadings of the catalysts were conducted on a Thermo-Fisher ICAP 6300 Radial inductively coupled plasma optical emission spectroscopy (ICP-OES) instrument.

**Supplementary Figures**

**Supplementary Figure 1.** HOR polarization curve of gold disk electrode obtained in H2-saturated 0.1 M HClO4.

**Supplementary Figure 2.** HOR polarization curves of EO-Ru obtained in H2-saturated 0.1 M HClO4.

**Supplementary Figure 3. a-d** Cuupd stripping voltammetry of (**a**) pristine Ru, (**b**) Temp-EO-Ru, (**c**) EO-Ru, and (**d**) Over-EO-Ru was conducted in the Ar-purged 0.5 M H2SO4 and 5 mM CuSO4 solution with a scanning rate of 10 mV s−1. The background curves are collected in the Ar-purged 0.5 M H2SO4.

**Supplementary Notes 1.** Discussion of the Cuupd for catalysts.

The broad peak around 0.4 V is known as the stripping of Cuupd, while the sharp peak around 0.32 V is regarded as the oxidation of Cu bulk. The Cu electrodeposit potential results in the largest peak of Cuupd stripping without the formation of Cu bulk, implying the complete coverage of monolayer Cu on Ru. Thus, these data are used to calculate the surface area of Ru.

As shown in Figure S3d, the massive loss of Cuupd stripping peak area and positive shift of peak potential indicates an almost complete conversion of surface Ru to RuO2.

**Supplementary Figure 4.** **a, c** Hupd stripping voltammetry of (**a**) EO-Rh and pristine Rh, (**c**) EO-Pd and pristine Pd. **b**, **d** The ECSA normalized Tafel plots of (**b**) EO-Rh and pristine Rh, (**d**) EO-Pd and pristine Pd.

**Supplementary Figure 5. a**-**f**,Fourier-transformed (FT) k2-weighted χ(k)-function of the EXAFS spectra for Ru K-edge. The hollow circle is the experimental value, and the solid lines are the fitted value. (**a**) Pristine Ru. (**b**) Temp-EO-Ru. (**c**) EO-Ru. (**d**) Over-EO-Ru. (**e**) Ru foil. (**f**) RuO2 powder.


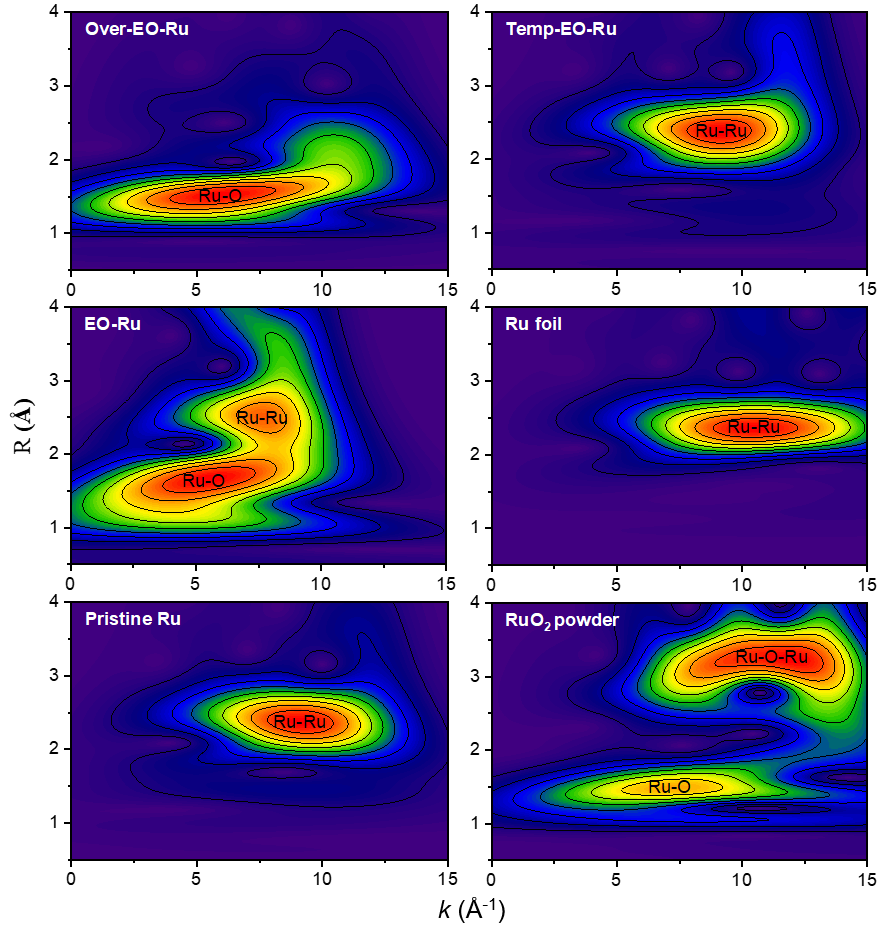


**Supplementary Figure 6.** Wavelet transforms for the EXAFS signals.

**Supplementary Figure 7.** *In-situ* SERS spectra for Ru thin film oxidized at 0 V, 1.2 V, 1.4 V, and 1.6 V.

**Supplementary Figure 8.** Time-resolved *in-situ* SERS spectra of Temp-EO-Ru at 0.1 V.

**Supplementary Figure 9. a,b** The surface evolution of (**a**) Temp-EO-Ru and (**b**) EO-Ru during the HOR process.

**Supplementary Notes 2.** Detailed evolution process of the Temp-EO-Ru and EO-Ru during the HOR process under H2 atmosphere.

For the Temp-EO-Ru, the peak of Ru−O bending appeared when an oxidation potential of 1.2 V was applied to the Ru thin film according to the Raman results (point a), which originated from the strong interaction between interfacial water and the Ru surface. During the backward scan under H2 atmosphere, OHad and Had formed on the Ru surface (point b), corresponding to the enhanced HOR with high current density. However, OHad was unstable and fell off the Ru surface during the next scan (point c), leading to HOR performance similar to that of pristine Ru.

For the EO-Ru, besides the peak of Ru−O bending, the new peak of Ru−O−Ru vibration appeared in the Raman spectrum when an oxidation potential of 1.4 V was applied to the Ru thin film, indicating the deep oxidation of the Ru thin film and the formation of lattice oxygen (point a). During the backward scan under H2 atmosphere, OHad and Had formed on the partially oxidized Ru surface (point b). Unlike the Temp-EO-Ru, the OHad remained stable on the Ru surface (point c), maintaining a high current density during the entire HOR process.

**Supplementary Figure 10.** CV of pristine Ru, Temp-EO-Ru, EO-Ru, and Over-EO-Ru in Ar-saturated 0.1 M HClO4.

**Supplementary Figure 11. a,b** *In-situ* ATR-SEIRAS spectra for Ru-H stretching vibration of (**a**) pristine Ru and (**b**) EO-Ru.

**Supplementary Figure 12.** Stark tunning rate of EO-Ru and pristine Ru.

**Supplementary Figure 13.** The *d*-band center on the pristine and partially oxidized Ru plane (Supplementary Table 3).

**Supplementary Figure 14.** The radial distribution function (RDF) between adsorbed H atom (Had) and O atoms on the pristine and partially oxidized Ru.

**Supplementary Figure 15.** *In-situ* ATR-SEIRAS spectra for the O-H stretching vibration of Temp-EO-Ru during a backward and the next forward scan. The reference spectrum was collected at 0.6 V for each scan.

**Supplementary Figure 16.** *In-situ* ATR-SEIRAS spectra for the O-H stretching vibration of EO-Ru during the forward scan. The reference spectrum was collected at 0.6 V.

**Supplementary Figure 17.** The size distribution of Ru-RuOx(OH)y nanoparticles.

**Supplementary Figure 18.** High-resolution Ru 3*d* XPS spectra of Ru, RuO2, and Ru-RuOx(OH)y.

**Supplementary Figure 19.** High-resolution O 1*s* XPS spectra of RuO2 and Ru-RuOx(OH)y.

**Supplementary Figure 20.** Ru K-edge X-ray absorption near-edge structure spectra of Ru/C and Ru-RuOx(OH)y/C. Ru foil and RuO2 powder are displayed as reference.

**Supplementary Figure 21. a-b,** Fourier-transformed (FT) k2-weighted χ(k)-function of the EXAFS spectra for Ru K-edge. The hollow circle is the experimental value, and the solid lines are the fitted value. (**a**) Ru/C. (**b**) Ru-RuOx(OH)y/C.

**Supplementary Figure 22.** The Tafel plots of the Ru-RuOx(OH)y/C, Ru/C, and RuO2.

**Supplementary Figure 23.** Summary of the reported PEMFC performances using different Pt-free anode catalysts in the literature (Supplementary Table 5).

**Supplementary Figure 24.** Polarization and power density curves of Pt/C-based PEMFC before and after 10 cycles of SU/SD protocols.

**Supplementary Figure 25.** Polarization and power density curves of Ru-RuOx(OH)y/C-based PEMFC before and after 10 cycles of SU/SD protocols.

**Supplementary Figure 26.** Polarization curves of Ru-RuOx(OH)y/C and Pt/C catalysts in O2-saturated 0.1 M HClO4 at a scan rate of 10 mV s−1 and a rotating speed of 1600 rpm.

**Supplementary Figure 27.** Polarization curves of Fe-N-C catalyst in O2-saturated 0.1 M HClO4 at a scan rate of 10 mV s−1 and a rotating speed of 1600 rpm. The Fe-N-C was synthesized follow the procedure reported by Wu et. al.1

**Supplementary Figure 28.** Summary of the peak power density and unit power catalyst cost for PEMFCs using non-Pt catalyst reported in literature (Data from Supplementary Table 2,3).

**Supplementary Tables**

**Supplementary Table 1.** Structure parameters extracted from the Ru K-edge EXAFS curves fitting for various catalysts (S02=0.8).

|  | Scattering pair | R(Å)a | Nb | c | (eV)d | R factor |
| --- | --- | --- | --- | --- | --- | --- |
| EO-Ru | Ru-O | 2.03 | 4.7 | 15.5 | −0.2 | 0.008 |
| Ru-Ru | 2.74 | 1.3 | 1.3 |
| Pristine Ru | Ru-Ru | 2.67 | 6.5 | 4.1 | 3.4 | 0.037 |
| Temo-EO-Ru | Ru-Ru | 2.66 | 6.2 | 4.6 | 2.2 | 0.020 |
| Over-EO-Ru | Ru-O | 2.02 | 3.0 | 3.5 | 1.2 | 0.037 |
| Ru foil | Ru-Ru | 2.67 | 12 | 2.4 | 2.9 | 0.010 |
| RuO2 | Ru-O | 1.96 | 6.0 | 0.2 | −1.8 | 0.041 |

a*R*: Bond distance; b*N*: coordination numbers; c: Debye-Waller factors; d: the inner potential correction. R factor: goodness of fit.

**Supplementary Table 2.** AIMD-simulated Had desorption energy and adsorption energy along with the H-O distance on pure and partially oxidized Ru plane.

| Model | Had desorption energy barrier (eV) | Had adsorption free energy (eV) | O--Had distance in the transition state (Å) |
| --- | --- | --- | --- |
| Prisitine Ru | 1.41 | −1.279 | 1.17 |
| Ru with 1/6 OHad coverage | 1.29 | −1.059 | 1.27 |
| Ru with 1/3 OHad coverage | 1.02 | −0.669 | 1.33 |
| Ru with 1/2 OHad coverage | 0.70 | −0.186 | 1.40 |
| Ru with 2/3 OHad coverage | 0.63 | −0.183 | 1.45 |

**Supplementary Table 3.** DFT-calculated surface charge, Fermi level, work function, electrode potential and *d*-band center on pure and partially oxidized Ru plane.

| Model | Surface charge (C) | Fermi level (eV) | Work function (eV) | Electrode potential (V vs SHE) | *d*-band center (eV) |
| --- | --- | --- | --- | --- | --- |
| Prisitine Ru | −0.061 | 1.761 | 4.527 | 0.087 | −1.628 |
| Ru with 1/6 OHad coverage | 0.113 | 1.662 | 4.545 | 0.105 | −1.638 |
| Ru with 1/3 OHad coverage | 0.155 | 1.544 | 4.595 | 0.155 | −1.64 |
| Ru with 1/2 OHad coverage | 0.261 | 1.308 | 4.872 | 0.432 | −1.646 |
| Ru with 2/3 OHad coverage | 0.351 | 1.34 | 4.844 | 0.404 | −1.671 |

**Supplementary Table 4.** Curvefit parameters for Ru K-edge EXAFS for Ru/C and Ru-RuOx(OH)y/C (S02=0.8).

|  | Scattering pair | R(Å)a | Nb | c | (eV)d | R factor |
| --- | --- | --- | --- | --- | --- | --- |
| Ru-RuOx(OH)y/C | Ru-O | 1.96 | 2.70 | 8.0 | −5.35 | 0.002 |
| Ru-Ru | 2.68 | 4.15 | 2.7 |
| Ru/C | Ru-Ru | 2.67 | 6.29 | 3.6 | 3.54 | 0.009 |

a*R*: Bond distance; b*N*: coordination numbers; c: Debye-Waller factors; d: the inner potential correction. R factor: goodness of fit.

**Supplementary Table 5.** Summary of the performance of PEMFCs with non-Pt anode.

|  | Catalyst | Catalyst loading  (mg cm−2) | Tcell (ºC) | Back pressure (kPag) | PPD  (W cm−2) | Unit power density catalyst costa ($ kW−1) | Ref. |
| --- | --- | --- | --- | --- | --- | --- | --- |
| anode | Ir-V/C | 0.4 | 70 | 100 | 0.598 | 57.4 | 2 |
| cathode | Pt/C | 0.4 |
| anode | Ir-V-Mo/C | 0.4 | 70 | 100 | 0.398 | 86.3 | 3 |
| cathode | Pt/C | 0.4 |
| anode | Pd-Co/gCN | 0.5 | 25 | 0 | 0.290 | 83.5 | 4 |
| cathode | Pt/C | 0.1 |
| anode | NiW/KC | 1.0 | 55 | 0 | 0.008 | 735 | 5 |
| cathode | Pt/C | 0.2 |
| anode | IrCo/C | 0.2 | 40 | 100 | 0.611 | 37.8 | 6 |
| cathode | Pt/C | 0.4 |
| anode | CoWC/KB | 1.0 | 65 | 0 | 0.016 | 1838 | 7 |
| cathode | Pt/C | 1.0 |
| anode | MoWC/KB | 1.0 | 65 | 0 | 0.012 | 2450 | 7 |
| cathode | Pt/C | 1.0 |
| anode | Ru-RuOx(OH)y/C | 0.05 | 80 | 200 | 2.54 | 4.83 | This work |
| cathode | Pt/C | 0.4 |
| anode | Ru-RuOx(OH)y/C | 0.05 | 80 | 200 | 0.842 | 0.62 | This work |
| cathode | Fe-N-C | 3.0 |

a The calcution method for the unit power density catalyst cost is described in Supplementary Notes 2.

**Supplementary Notes 3.** Calculation of the unit power catalyst cost for the PEMFCs.

The unit power catalyst cost of PEMFC was obtained according to the following equation.

(6)

Where *m*a is the PGM loading of on anode, *m*c is the PGM loading of on cathode, and *P* is the PPD of the PEMFC. Note, only the price for PGM is accounted and the price of the non-PGM materials is neglected due to their relatively low cost.

The average price of the PGMs for the past five years are listed below (Data from Johnson Matthey).8

| PGM | Pt | Ru | Rh | Pd | Os | Ir | Au | Ag |
| --- | --- | --- | --- | --- | --- | --- | --- | --- |
| Price ($ g−1) | 29.4 | 10.4 | 96.9 | 42.5 | 14.7 | 56.6 | 43.3 | 0.5 |

**Supplementary Table 6.** Summary of the performance of PEMFCs with non-Pt cathode.

|  | Catalyst | Catalyst loading (mg cm−2) | Tcell (ºC) | Back pressure (kPag) | PPD  (W cm−2) | Unit power density catalyst cost ($ kW−1) | Ref. |
| --- | --- | --- | --- | --- | --- | --- | --- |
| anode | Pt/C | 0.4 | 80 | 200 | 1.030 | 11.4 | 9 |
| cathode | Fe-S-N-C | 4.0 |
| anode | Pt/C | 0.35 | 80 | 150 | 1.141 | 9.02 | 10 |
| cathode | Fe2-Z8-C | 2.8 |
| anode | Pt/C | 0.3 | 80 | 100 | 0.870 | 10.1 | 11 |
| cathode | Co-N-C | 4.0 |
| anode | Pt/C | 0.1 | 80 | 200 | 0.980 | 3.0 | 12 |
| cathode | Fe,Co-NC | 0.77 |
| anode | Pt/C | 2.0 | 80 | 200 | 0.940 | 62.5 | 13 |
| cathode | Fe-N-C | 4.0 |
| anode | Pt/C | 0.3 | 80 | 200 | 0.392 | 22.5 | 14 |
| cathode | W2N/C | 0.644 |
| anode | Pt/C | 0.3 | 80 | 200 | 0.065 | 135 | 15 |
| cathode | Mo2N/C | 0.609 |
| anode | Pt/C | 0.25 | 80 | 150 | 0.550 | 13.3 | 1 |
| cathode | Mn-N-C | 4.0 |
| anode | Pt/C | 0.4 | 80 | 100 | 0.820 | 14.3 | 16 |
| cathode | ZIF'-FA-CNT-p | 1.5 |
| anode | Pt/C | 0.3 | 80 | 150 | 0.730 | 12.1 | 17 |
| cathode | PFeTTPP-1000 | 4.1 |
| anode | Pt/C | 0.35 | 80 | 50 | 0.910 | 11.3 | 18 |
| cathode | Fe/Phen/ZIF-8 | 3.9 |
| anode | Pt/C | 0.3 | 80 | 100 | 0.463 | 19.1 | 19 |
| cathode | Fe-NMCSs | 4.0 |
| anode | Pt/C | 0.3 | 80 | 200 | 0.900 | 9.79 | 20 |
| cathode | Fe-N-CF | 3.0 |
| anode | Ru-RuOx(OH)y/C | 0.05 | 80 | 200 | 0.842 | 0.62 | This work |
| cathode | Fe-N-C | 3.0 |

a The calcution method for the unit power density catalyst cost is described in Supplementary Notes 2.

**Supplementary References**

1 Li, J. *et al.* Atomically dispersed manganese catalysts for oxygen reduction in proton-exchange membrane fuel cells. *Nat. Catal.* **1**, 935-945 (2018).

2 Li, B. *et al.* Synthesis of a highly active carbon-supported Ir–V/C catalyst for the hydrogen oxidation reaction in PEMFC. *Electrochim. Acta* **54**, 5614-5620 (2009).

3 Li, B. *et al.* New non-platinum Ir–V–Mo electro-catalyst, catalytic activity and CO tolerance in hydrogen oxidation reaction. *Int. J. Hydrog. Energy* **37**, 18843-18850 (2012).

4 Ghosh, A., Chandran, P. & Ramaprabhu, S. Palladium-nitrogen coordinated cobalt alloy towards hydrogen oxidation and oxygen reduction reactions with high catalytic activity in renewable energy generations of proton exchange membrane fuel cell. *Appl. Energy* **208**, 37-48 (2017).

5 Nagai, M., Yoshida, M., Tominaga, H. Tungsten and nickel tungsten carbides as anode electrocatalysts. *Electrochim. Acta* **52**, 5430–5436 (2007).

6 Yang, D., Li, B., Zhang, H., Ma, J. High performance by applying IrCo/C nanoparticles as an anode catalyst for PEMFC. *Fuel Cells* **13**, 309-313 (2012).

7 Izhar, S., Yoshida, M., Nagai, M. Characterization and performances of cobalt–tungsten and molybdenum–tungsten carbides as anode catalyst for PEFC. *Electrochim. Acta* **54**, 1255–1262 (2009).

8 Platinum group metals price and trading. Johnson Matthey. https://matthey.com/products-and-markets/pgms-and-circularity/pgm-management.

9 Wang, Y. C. *et al.* S-doping of an Fe/N/C ORR catalyst for polymer electrolyte membrane fuel cells with high power density. *Angew. Chem. Int. Ed.* **54**, 9907-9910 (2015).

10 Liu, Q., Liu, X., Zheng, L. & Shui, J. The solid-phase synthesis of an Fe-N-C electrocatalyst for high-power proton-exchange membrane fuel cells. *Angew. Chem. Int. Ed.* **57**, 1204-1208, (2018).

11 He, Y. *et al*. Highly active atomically dispersed CoN4 fuel cell cathode catalysts derived from surfactant-assisted MOFs: Carbon-shell confinement strategy. *Energy Environ. Sci.* **12**, 250-260 (2019).

12 Wang, J. *et al.* Design of N-coordinated dual-metal sites: A stable and active Pt-free catalyst for acidic oxygen reduction reaction. *J. Am. Chem. Soc.* **139**, 17281-17284, (2017).

13 Chung, H. T. *et al*. Direct atomic-level insight into the active sites of a high-performance PGM-free ORR catalyst. *Science* **357**, 479–484 (2017).

14 Zhong, H., Zhang, H., Liang, Y., Zhang, J., Wang, M., Wang, X. A novel non-noble electrocatalyst for oxygen reduction in proton exchange membrane fuel cells. *J. Power Sources* **164**, 572–577, (2007).

15 Zhong, H., Zhang, H., Liu, G., Liang, Y., Hu, J., Yi, B. A novel non-noble electrocatalyst for PEM fuel cell based on molybdenum nitride. *Electrochem. Commun.* **8**, 707–712, (2006).

16 Zhang, C. *et al.* Networking pyrolyzed zeolitic imidazolate frameworks by carbon nanotubes improves conductivity and enhances oxygen-reduction performance in polymer-electrolyte-membrane fuel cells. *Adv. Mater.* **29**, 1604556 (2017).

17 Yuan, S. *et al*. A highly active and support-free oxygen reduction catalyst prepared from ultrahigh-surface-area porous polyporphyrin. *Angew. Chem. Int. Ed.* **52**, 8349–8353 (2013).

18 Proietti, E., Jaouen, F., Lefèvre, M., Larouche, N., Tian, J., Herranz, J. & Dodelet, J. Iron-based cathode catalyst with enhanced power density in polymer electrolyte membrane fuel cells. *Nat. Commun.* **2**, 416, (2011).

19 Meng, F. L., Wang, Z. L., Zhong, H. X., Wang, J., Yan, J. M., Zhang, X. B. Reactive multifunctional template-induced preparation of Fe-N-doped mesoporous carbon microspheres towards highly efficient electrocatalysts for oxygen reduction. *Adv. Mater.* **28**, 7948–7955, (2016).

20 Shui, J., Chen, C., Grabstanowicz, L., Zhao, D., Liu, D. J. Highly efficient nonprecious metal catalyst prepared with metal–organic framework in a continuous carbon nanofibrous network. *PNAS* **112**, 10629–10634, (2015).
